# Supplementary material
Source: publisher site journal article supplement (https://www.dovepress.com/article/379700)
Supplement: Supplementary file 1 [file get_supplementary_file.php]

**Title:** Using Machine Learning to Predict the Likelihood and Cause of Readmission after Hospitalization for Chronic Obstructive Pulmonary Disease Exacerbation

**Running Title:** Machine Learning to Predict COPD Readmission

**Authors:** 1Bonomo Matthew*, 1Hermsen Michael*, 1Kaskovich Samuel, 1Hemmrich Maximilian, 2Rojas Juan C, 3Carey Kyle, 4Venable Laura Ruth, 5Churpek Matthew M, 3,6Press Valerie G

*contributed equally

**Online Supplement**

**Supplemental Figure 1.** Calibration curve for 90-day readmission risk model

**
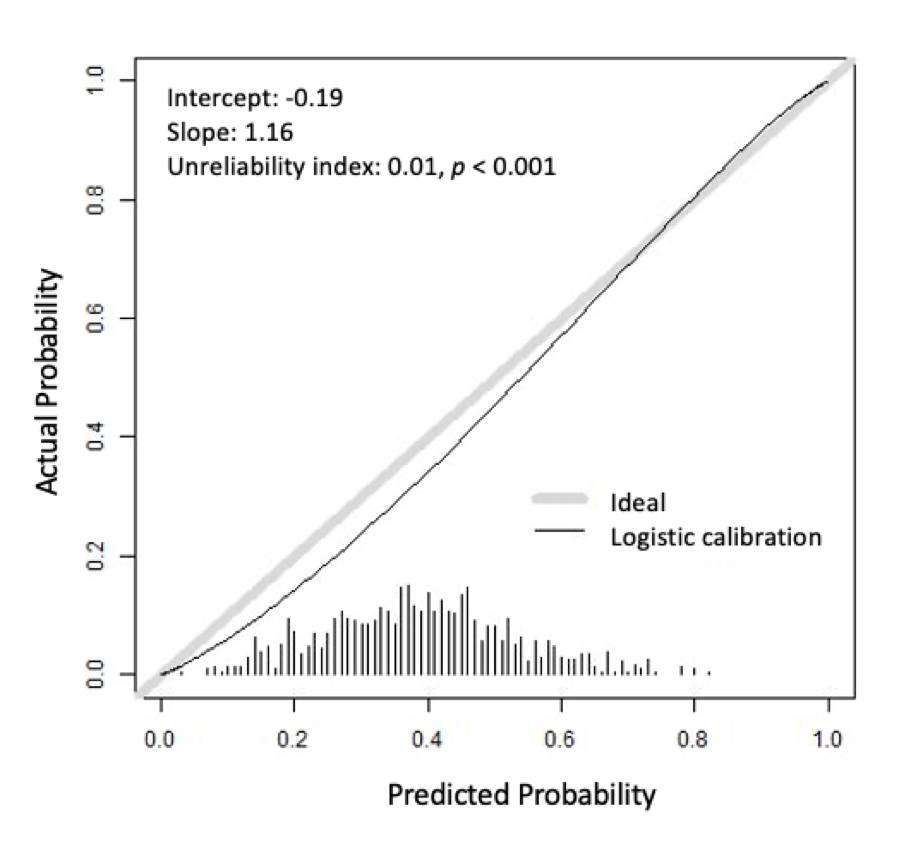
**

**
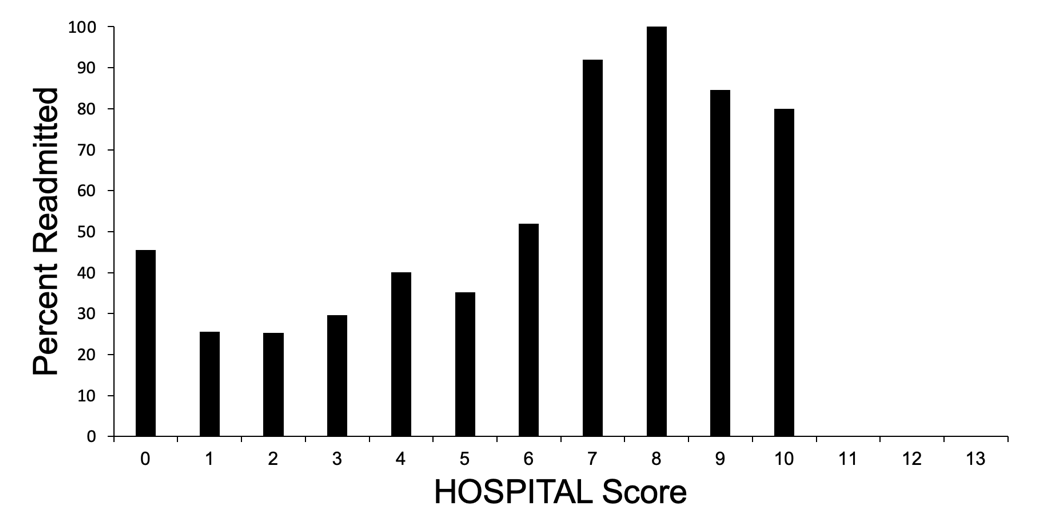
Supplemental Figure 2.** Calibration curve for HOSPITAL score in predicting 90-day readmissions

Legend: There were no patients with HOSPITAL scores of 11 or higher.

**Supplemental Figure 3.** Calibration curve for 90-day readmission cause model

**
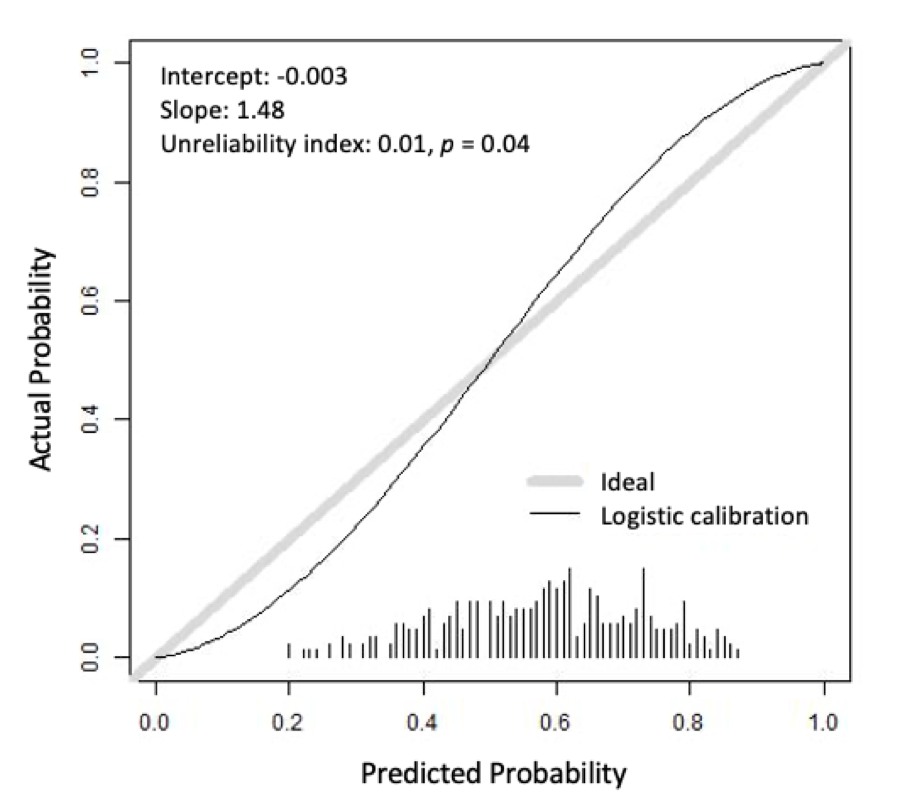
**

**
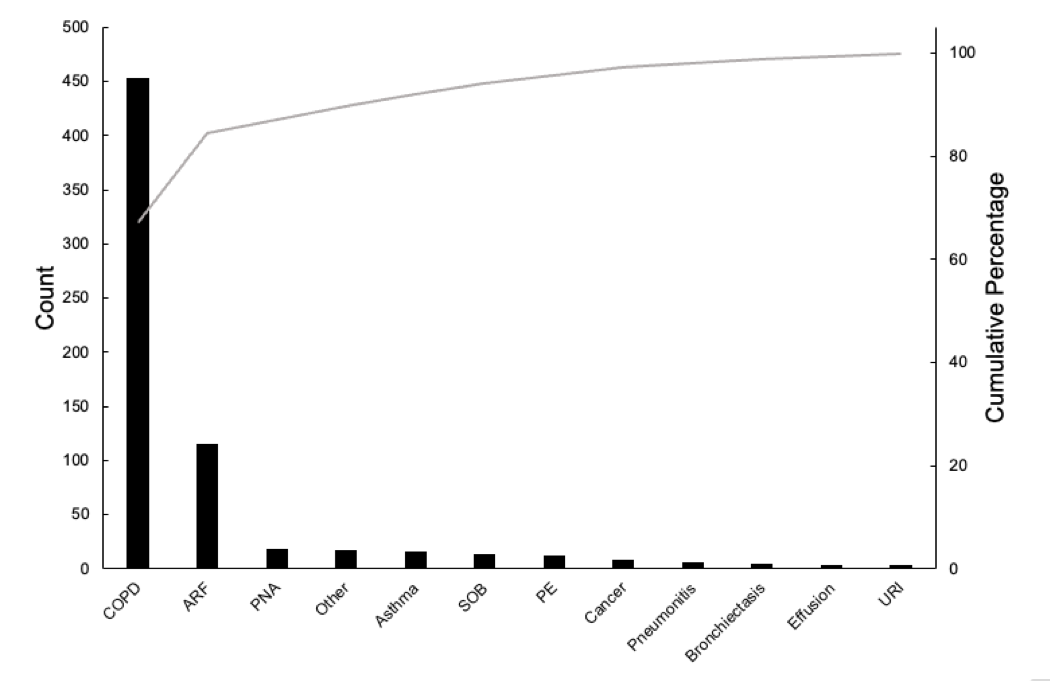
Supplemental Figure 4.** Pareto Chart for Respiratory Readmission Diagnoses

Legend: Categories modified from those in similar prior work by Shah, et al.6

**
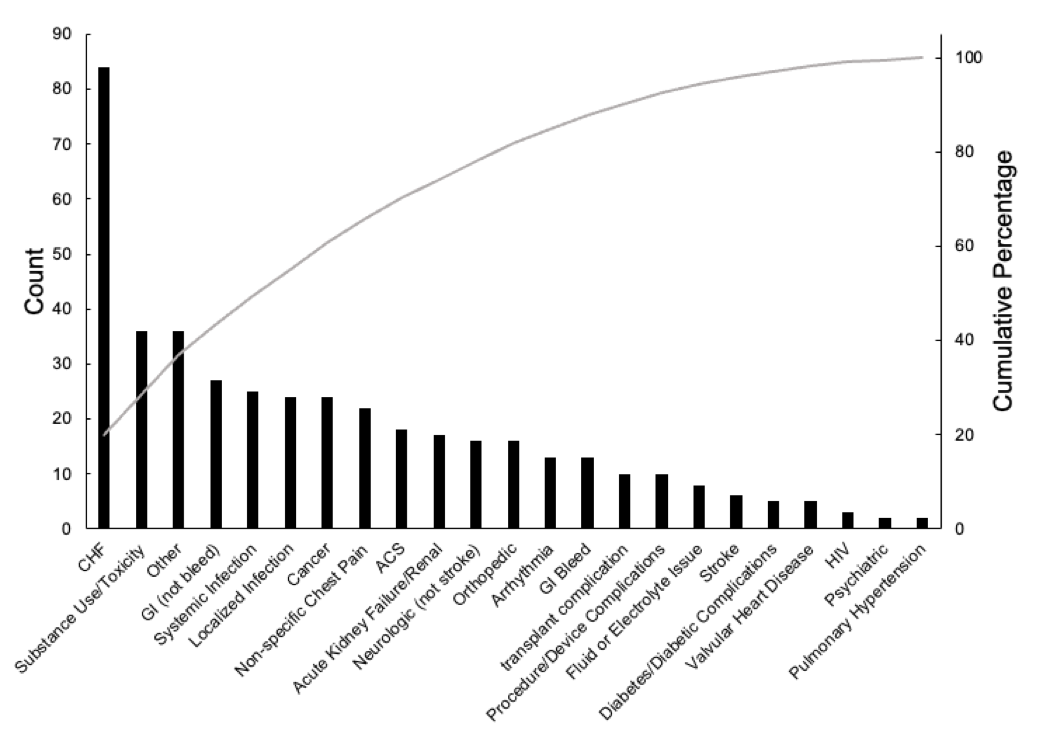
Supplemental Figure 5.** Pareto Chart for Non-respiratory Readmission Diagnoses

Legend: Categories modified from those in similar prior work by Shah, et al.6
